# Supplementary material for: Differential effects of follicle-stimulating hormone glycoforms on the transcriptome profile of cultured rat granulosa cells as disclosed by RNA-seq
Source: PubMed Central journal article supplement (PMC11156319; doi:10.1371/journal.pone.0293688), 2024-06-06
Supplement: pone.0293688.s001.pdf [file pone.0293688.s001.pdf]

S1 Table. A representative subset of overexpressed genes at 6 hours of FSH glycoform exposure. Rows in *green* color are unique genes for the corresponding glycoform, whereas those in *orange* are genes shared with other glycoforms.

| FSH18/21    |                                           |                     |             |
|-------------|-------------------------------------------|---------------------|-------------|
| Gene Symbol | Gene name                                 | ENSRNOG             | LogFC       |
| Cyp19a1     | P450 arom                                 | ENSRNOT00000000212  | 1.110000000 |
| Lrrc4b      | Leucine Rich Repeat Containing 4B         | ENSRNOG00000019418  | 1.233494517 |
| Cthrc1      | Collagen triple helix repeat containing 1 | ENSRNOG00000004578  | 1.427198254 |
| Sult1b1     | Sulfotransferase Family 1B Member 1       | ENSRNOG00000001967  | 1.880469362 |
| Sbk1        | SH3 domain Binding Kinase1                | ENSRNOG000000057696 | 4.074306225 |

| FSH24          |                                               |                     |             |
|----------------|-----------------------------------------------|---------------------|-------------|
| Gene Symbol    | Gene name                                     | ENSRNOG             | LogFC       |
| LOC103692716   | heat shock protein HSP 90-alpha               | ENSRNOG00000007219  | 1.787932819 |
| LOC100911319   | zinc finger protein 36, C3H1 type-like 2-like | ENSRNOG000000050108 | 2.103606244 |
| AABR07017110.1 | Transcription elongation factor A1-like 1     | ENSRNOG00000005869  | 2.403808315 |
| LOC103689931   | heterogeneous nuclear ribonucleoprotein A/B   | ENSRNOG000000046272 | 2.895066489 |
| LOC100911515   | Triosephosphate isomerase-like                | ENSRNOG000000050669 | 4.586725682 |

| recFSH       |                                               |                     |             |
|--------------|-----------------------------------------------|---------------------|-------------|
| Gene Symbol  | Gene name                                     | ENSRNOG             | LogFC       |
| Acsbg1       | acyl-CoA synthetase bubbligum family member 1 | ENSRNOG00000011381  | 1.141923857 |
| Lhcgr        | lutinizing hormone-chriogonadotropin receptor | ENSRNOT00000022481  | 1.220000000 |
| Ly9          | lymphocyte antigen 9                          | ENSRNOG000000025069 | 1.453417476 |
| LOC100911319 | zinc finger protein 36, C3H1 type-like 2-like | ENSRNOG000000050108 | 1.806081224 |
| Cpne1        | copine 1                                      | ENSRNOG000000050864 | 3.235120002 |

| eqFSH        |                                               |                     |             |
|--------------|-----------------------------------------------|---------------------|-------------|
| Gene Symbol  | Gene name                                     | ENSRNOG             | LogFC       |
| LOC103692716 | heat shock protein HSP 90-alpha               | ENSRNOG00000007219  | 1.756211659 |
| LOC100911319 | zinc finger protein 36, C3H1 type-like 2-like | ENSRNOG000000050108 | 2.149543106 |
| LOC103689931 | heterogeneous nuclear ribonucleoprotein A/B   | ENSRNOG000000046272 | 2.818252315 |
| LOC100911515 | triosephosphate isomerase-like                | ENSRNOG000000050669 | 4.314492925 |
| LOC100365839 | 40S ribosomal protein S3a-like                | ENSRNOG000000048109 | 6.882034523 |
