# Supplementary material for: Differential effects of follicle-stimulating hormone glycoforms on the transcriptome profile of cultured rat granulosa cells as disclosed by RNA-seq
Source: PubMed Central journal article supplement (PMC11156319; doi:10.1371/journal.pone.0293688), 2024-06-06
Supplement: pone.0293688.s002.pdf [file pone.0293688.s002.pdf]

S2 Table. A representative subset of overexpressed genes at 12 hours of FSH glycoform exposure. Rows in *green* color are unique genes for the corresponding glycoform, whereas those in *orange* are genes shared with other glycoforms.

| FSH18/21    |                                                |                    |             |
|-------------|------------------------------------------------|--------------------|-------------|
| Gene Symbol | Gene name                                      | ENSRNOG            | LogFC       |
| Nppc        | natriuretic peptide C                          | ENSRNOG00000018854 | 2.097631300 |
| Acsbg1      | Acyl-CoA synthetase bubblegum family member 1  | ENSRNOG00000011381 | 2.199123724 |
| Tmem178b    | transmembrane protein 178B                     | ENSRNOG00000047635 | 2.539311373 |
| Lhcgr       | Luteinizing hormone-chriogonadotropin receptor | ENSRNOT00000022481 | 3.617129804 |
| Cyp19a1     | P450arom                                       | ENSRNOG00000000196 | 4.196460356 |

| FSH24       |                                                 |                    |             |
|-------------|-------------------------------------------------|--------------------|-------------|
| Gene Symbol | Gene name                                       | ENSRNOG            | LogFC       |
| Acsbg1      | acyl-CoA synthetase bubblegum family member 1   | ENSRNOG00000011381 | 2.080032062 |
| Tmem178b    | transmembrane protein 178B                      | ENSRNOG00000047635 | 2.286677054 |
| Lhcgr       | Luteinizing hormone/choriogonadotropin receptor | ENSRNOT00000022481 | 3.203317271 |
| Cyp19a1     | P450arom                                        | ENSRNOG00000000196 | 3.340484357 |
| Inmt        | indolethylamine N-methyltransferase             | ENSRNOG00000011250 | 3.730104998 |

| recFSH      |                                                |                    |             |
|-------------|------------------------------------------------|--------------------|-------------|
| Gene Symbol | Gene name                                      | ENSRNOG            | LogFC       |
| Srcin1      | SRC kinase signaling inhibitor 1               | ENSRNOG00000011475 | 1.86312316  |
| Tmem178a    | Transmembrane protein 178A                     | ENSRNOG00000007907 | 1.916738806 |
| Tmem178b    | Transmembrane protein 178B                     | ENSRNOG00000047635 | 2.196115722 |
| Upk1b       | Uroplakin 1B                                   | ENSRNOG00000027380 | 2.458571633 |
| Lhcgr       | Luteinizing hormone-chriogonadotropin receptor | ENSRNOT00000022481 | 2.510000000 |

| eqFSH       |                                                |                    |             |
|-------------|------------------------------------------------|--------------------|-------------|
| Gene Symbol | Gene name                                      | ENSRNOG            | LogFC       |
| Tmem178a    | transmembrane protein 178A                     | ENSRNOG00000007907 | 1.904365537 |
| Abi3bp      | ABI family member 3 binding protein            | ENSRNOG00000001627 | 2.033449035 |
| Srcin1      | SRC kinase signaling inhibitor 1               | ENSRNOG00000011475 | 2.073592126 |
| Tmem178b    | transmembrane protein 178B                     | ENSRNOG00000047635 | 2.303801799 |
| Lhcgr       | luteinizing hormone-chriogonadotropin receptor | ENSRNOT00000022481 | 2.716207033 |
