# Supplementary material for: Differential effects of follicle-stimulating hormone glycoforms on the transcriptome profile of cultured rat granulosa cells as disclosed by RNA-seq
Source: PubMed Central journal article supplement (PMC11156319; doi:10.1371/journal.pone.0293688), 2024-06-06
Supplement: pone.0293688.s003.pdf [file pone.0293688.s003.pdf]

S3 Table. A representative subset of underexpressed genes at 6 hours of FSH glycoform exposure. Rows in *green* color are unique genes for the corresponding glycoform, whereas those in *orange* are genes shared with other glycoforms.

| FSH18/21       |                          |                     |              |
|----------------|--------------------------|---------------------|--------------|
| Gene Symbol    | Gene name                | ENSRNOG             | LogFC        |
| Serpinb2       | serpin family B member 2 | ENSRNOG00000002460  | -0.933897522 |
| AABR07063424.1 | -                        | ENSRNOG000000060896 | -0.860295243 |
| AABR07015080.2 | -                        | ENSRNOG000000059586 | -0.859621907 |
| AABR07015078.1 | -                        | ENSRNOG000000055956 | -0.85951943  |
| AABR07015066.1 | -                        | ENSRNOG000000046600 | -0.859432827 |

| FSH24        |                                                         |                     |              |
|--------------|---------------------------------------------------------|---------------------|--------------|
| Gene Symbol  | Gene name                                               | ENSRNOG             | LogFC        |
| Eif4g1       | eukaryotic translation initiation factor 4 gamma 1-like | ENSRNOG000000049598 | -2.6181025   |
| LOC108353446 | 40S ribosomal protein S2 pseudogene                     | ENSRNOG000000005116 | -1.688086149 |
| LOC100911575 | 60S acidic ribosomal protein P2-like                    | ENSRNOG000000037607 | -1.325378827 |
| Rplp2        | ribosomal protein lateral stalk subunit P2              | ENSRNOG000000002116 | -1.324964798 |
| Rps19        | ribosomal protein S19-like2                             | ENSRNOG000000037897 | -1.221079272 |

| recFSH         |                                               |                     |              |
|----------------|-----------------------------------------------|---------------------|--------------|
| Gene Symbol    | Gene name                                     | ENSRNOG             | LogFC        |
| Rbm12          | RNA binding motif protein 12                  | ENSRNOG000000046990 | -1.967150559 |
| AABR07042077.1 | -                                             | ENSRNOG000000002734 | -1.160515769 |
| Tox3           | TOX high mobility group box family member 3   | ENSRNOG000000028649 | -1.034259027 |
| Vom2r4         | vomer nasal 2 receptor, 4                     | ENSRNOG000000047388 | -0.886585355 |
| Fam131b        | family with sequence similarity 131, member B | ENSRNOG000000017149 | -0.817911791 |

| eqFSH          |                                            |                     |              |
|----------------|--------------------------------------------|---------------------|--------------|
| Gene Symbol    | Gene name                                  | ENSRNOG             | LogFC        |
| AABR07002564.1 | -                                          | ENSRNOG000000022227 | -2.26932217  |
| Lurap1l        | leucine rich adaptor protein 1-like        | ENSRNOG000000033740 | -2.244014822 |
| LOC108353446   | 40S ribosomal protein S2 pseudogene        | ENSRNOG000000005116 | -1.543680393 |
| AABR07016640.1 | -                                          | ENSRNOG000000037522 | -1.497071649 |
| Rplp2          | ribosomal protein lateral stalk subunit P2 | ENSRNOG000000002116 | -1.412925958 |
