# Supplementary material for: Differential effects of follicle-stimulating hormone glycoforms on the transcriptome profile of cultured rat granulosa cells as disclosed by RNA-seq
Source: PubMed Central journal article supplement (PMC11156319; doi:10.1371/journal.pone.0293688), 2024-06-06
Supplement: pone.0293688.s004.pdf [file pone.0293688.s004.pdf]

S4 Table. A representative subset of underexpressed genes at 12 hours of FSH glycoform exposure. Rows in *green* color are unique genes for the corresponding glycoform, whereas those in *orange* are genes shared with other glycoforms.

| FSH18/21    |                                               |                    |              |
|-------------|-----------------------------------------------|--------------------|--------------|
| Gene Symbol | Gene name                                     | ENSRNOG            | LogFC        |
| Slc7a11     | solute carrier family 7 member 11             | ENSRNOG00000010210 | -1.847219506 |
| Fosl1       | FOS like 1, AP-1 transcription factor subunit | ENSRNOG00000020552 | -1.533987983 |
| Hbb-bs      | hemoglobin, beta adult s chain                | ENSRNOG00000061299 | -1.410551353 |
| Plxna2      | plexin A2                                     | ENSRNOG00000007324 | -1.389753984 |
| Nav3        | neuron navigator 3                            | ENSRNOG00000052157 | -1.201679526 |

| FSH24       |                             |                    |              |
|-------------|-----------------------------|--------------------|--------------|
| Gene Symbol | Gene name                   | ENSRNOG            | LogFC        |
| Plxna2      | plexin A2                   | ENSRNOG00000007324 | -1.425020385 |
| Sema3e      | semaphorin 3E               | ENSRNOG00000006631 | -1.055925692 |
| Niban1      | niban apoptosis regulator 1 | ENSRNOG00000002403 | -1.0311566   |
| Angptl4     | Angiopoietin-like 4         | ENSRNOG00000007545 | -0.968333237 |
| Pvr         | PVR cell adhesion molecule  | ENSRNOG00000019202 | -0.96014559  |

| recFSH      |                                                                                 |                    |              |
|-------------|---------------------------------------------------------------------------------|--------------------|--------------|
| Gene Symbol | Gene name                                                                       | ENSRNOG            | LogFC        |
| Fosl1       | FOS like 1, AP-1 transcription factor subunit                                   | ENSRNOG00000020552 | -1.520469579 |
| Plxna2      | plexin A2                                                                       | ENSRNOG00000007324 | -1.172556625 |
| Cited1      | Cbp/p300-interacting transactivator with Glu/Asp-rich carboxy-terminal domain 1 | ENSRNOG00000003189 | -1.076087521 |
| Nefm        | neurofilament medium                                                            | ENSRNOG00000013916 | -1.067886743 |
| Dmnl2       | Dmx-like 2                                                                      | ENSRNOG00000009170 | -0.918660843 |

| eqFSH       |                                                           |                    |              |
|-------------|-----------------------------------------------------------|--------------------|--------------|
| Gene Symbol | Gene name                                                 | ENSRNOG            | LogFC        |
| Hbb-bs      | hemoglobin, beta adult s chain                            | ENSRNOG00000061299 | -1.469645995 |
| Hbb         | hemoglobin subunit beta                                   | ENSRNOG00000058105 | -1.418580545 |
| St6galnac3  | ST6 N-acetylgalactosaminide alpha-2,6-sialyltransferase 3 | ENSRNOG00000056894 | -1.357981341 |
| Plxna2      | plexin A2                                                 | ENSRNOG00000007324 | -1.301302127 |
| Angptl4     | Angiopoietin-like 4                                       | ENSRNOG00000007545 | -1.100253745 |
