# Supplementary material for: Differential effects of follicle-stimulating hormone glycoforms on the transcriptome profile of cultured rat granulosa cells as disclosed by RNA-seq
Source: PubMed Central journal article supplement (PMC11156319; doi:10.1371/journal.pone.0293688), 2024-06-06

# PI3K-AKT pathway 12h

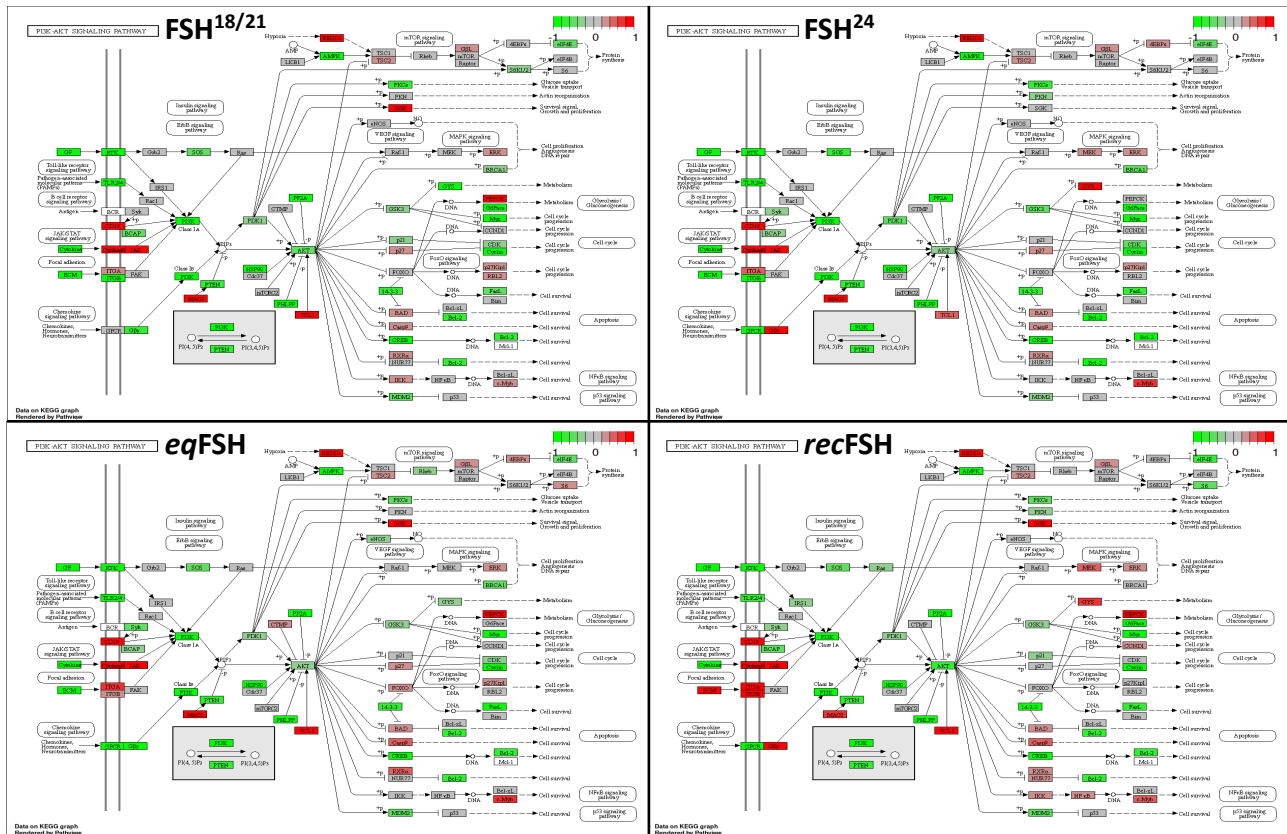

Supplement: pone.0293688.s014.pdf [file pone.0293688.s014.pdf]
